# Supplementary material
Source: PubMed Central journal article supplement (PMC10257086)
Supplement: mmc1.pdf [file mmc1.pdf]

**Biophysical Journal, Volume 122**

**Supplemental information**

**Length matters: Functional flip of the short TatA transmembrane helix**

**Eva R. Stockwald, Lena M.E. Steger, Stefanie Vollmer, Christina Gottselig, Stephan L. Grage, Jochen Bürck, Sergii Afonin, Julia Fröbel, Anne-Sophie Blümmel, Julia Setzler, Wolfgang Wenzel, Torsten H. Walther, and Anne S. Ulrich**

**This PDF file includes:**

Table S1  
Figures S1 to S5  
SI References

**Table S 1 Template plasmids and primers for the construction of the TatA constructs**

| TatA mutant                                            | plasmid                                                         | template plasmid                               | forward primer                                                                                                | reverse primer                                                                                                |
|--------------------------------------------------------|-----------------------------------------------------------------|------------------------------------------------|---------------------------------------------------------------------------------------------------------------|---------------------------------------------------------------------------------------------------------------|
| TatA <sub>2-45</sub> ΔLIL                              | pET28 TatA <sub>1-45</sub><br>ΔLIL                              | pET28 TatA <sub>1-45</sub>                     | 5'-GA ATA CCG GGC ATC TTC<br>GTC ATC GC-3'                                                                    | 5'-GC GAT GAC GAA GAT GCC<br>CGG TAT TC-3'                                                                    |
| TatA <sub>2-45</sub> LAL                               | pET28 TatA <sub>1-45</sub><br>LAL                               | pET28 TatA <sub>1-45</sub>                     | 5'-GGC TTG ATT CTC <b>CTG</b><br><b>GCG TTG</b> ATC TTC GTC ATC-3'                                            | 5'-GAT GAC GAA GAT <b>CAA</b><br><b>CGC CAG</b> GAG AAT CAA GCC-<br>3'                                        |
| TatA <sub>2-45</sub> LALAL                             | pET28 TatA <sub>1-45</sub><br>LALAL                             | pET28 TatA <sub>1-45</sub>                     | 5'-GGC TTG ATT CTC <b>CTG</b><br><b>GCG TTG GCC CTG</b> ATC TTC<br>GTC ATC-3'                                 | 5'-GAT GAC GAA GAT <b>CAG</b><br><b>GGC CAA CGC CAG</b> GAG AAT<br>CAA GCC-3'                                 |
| TatA <sub>2-45</sub> LALALAL                           | pET28 TatA <sub>1-45</sub><br>LALALAL                           | pET28 TatA <sub>1-45</sub>                     | 5'-GGC TTG ATT CTC <b>CTG</b><br><b>GCG TTG GCC CTG GCG TTG</b><br>ATC TTC GTC ATC-3'                         | 5'-GAT GAC GAA GAT <b>CAA</b><br><b>CGC CAG GGC CAA CGC CAG</b><br>GAG AAT CAA GCC-3'                         |
| TatA <sub>2-45</sub> F <sub>2</sub> D                  | pET28 TatA <sub>1-45</sub><br>F <sub>2</sub> D                  | pET28 TatA <sub>1-45</sub>                     | 5'-CGC GGC AGC CAT ATG<br><b>GAT</b> TCA AAC ATT GGA ATA<br>CCG-3'                                            | 5'-CGG TAT TCC AAT GTT TGA<br><b>ATC</b> CAT ATG GCT GCC GCG-<br>3'                                           |
| TatA <sub>2-45</sub> F <sub>2</sub> D I <sub>7</sub> D | pET28 TatA <sub>1-45</sub><br>F <sub>2</sub> D I <sub>7</sub> D | pET28 TatA <sub>1-45</sub><br>F <sub>2</sub> D | 5'-GAT TCA AAC ATT GGA <b>GAT</b><br>CCG GGC TTG ATT CTC-3'                                                   | 5'-GAG AAT CAA GCC CGG<br><b>ATC</b> TCC AAT GTT TGA ATC-3'                                                   |
| <i>E. coli</i> TatA LAL                                | pET22b+TatA LAL<br>BCD                                          | pET22b+TatABCD                                 | 5'-GT ATT TGG CAG TTA TTG<br>ATT <b>CTG GCG TTG</b> ATT GCC<br>GTC ATC GTT GTA C-3'                           | 5'-G TAC AAC GAT GAC GGC<br>AAT <b>CAA CGC CAG</b> AAT CAA<br>TAA CTG CCA AAT AC-3'                           |
| <i>E. coli</i> TatA LALA                               | pET22b+TatA<br>LALA BCD                                         | pET22b+TatABCD                                 | 5'-GT ATT TGG CAG TTA TTG<br>ATT <b>CTG GCG TTG GCC</b> ATT<br>GCC GTC ATC GTT GTA C-3'                       | 5'-G TAC AAC GAT GAC GGC<br>AAT <b>GGC CAA CGC CAG</b> AAT<br>CAA TAA CTG CCA AAT AC-3'                       |
| <i>E. coli</i> TatA<br>LALALAL                         | pET22b+TatA<br>LALALAL BCD                                      | pET22b+TatABCD                                 | 5'-GT ATT TGG CAG TTA TTG<br>ATT <b>CTG GCG TTG GCC CTG</b><br><b>GCG TTG</b> ATT GCC GTC ATC<br>GTT GTA C-3' | 5'-G TAC AAC GAT GAC GGC<br>AAT <b>CAA CGC CAG GGC CAA</b><br><b>CGC CAG</b> AAT CAA TAA CTG<br>CCA AAT AC-3' |

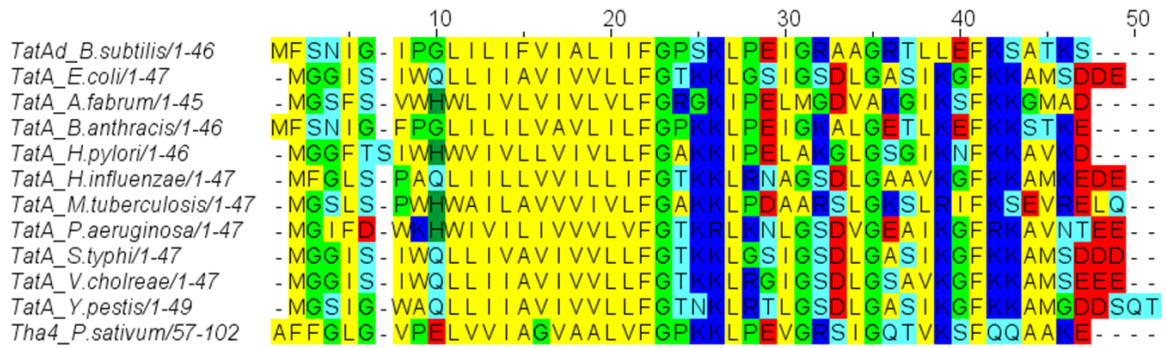

**Figure S1: Sequence alignment of TatA from different organisms.** Only the sequences of the TMH and APH are shown (the sequence of *P. sativum* is additionally N-terminally truncated). The sequence alignment proves that the unusual short length of the TatA TMH is highly conserved. The colors illustrate the different types of residues: yellow - hydrophobic (Leu, Ile, Val, Phe, Ala, Met, Trp); red - anionic (Asp, Glu); blue - cationic (Lys, Arg); light blue - polar (Ser, Thr, Gln, Asn, Tyr, Cys); light green - helix modifiers (Pro, Gly); dark green - ionizable (His). Data were created using the software Clustal [147] and Jalview [148].

**A**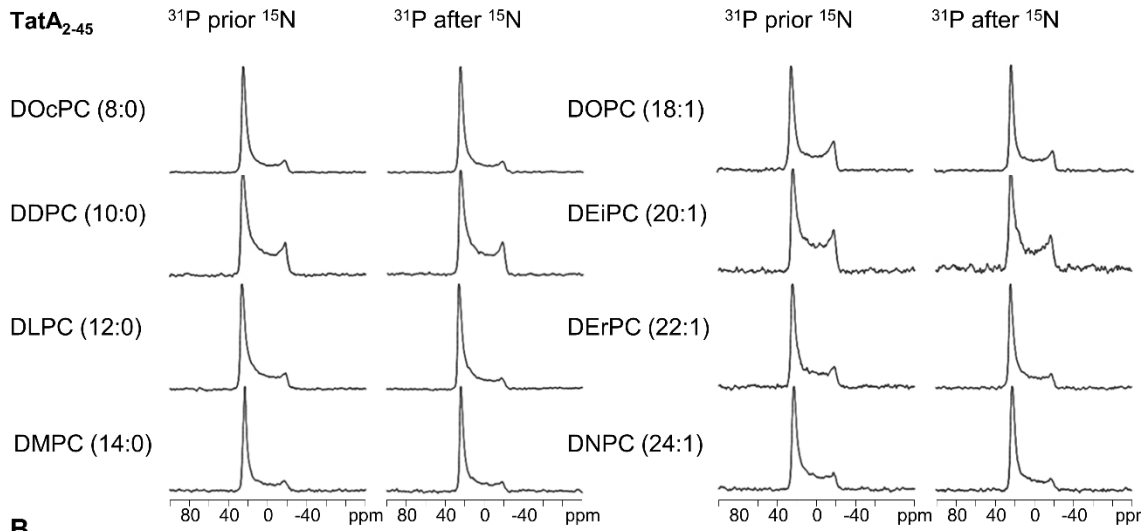**B**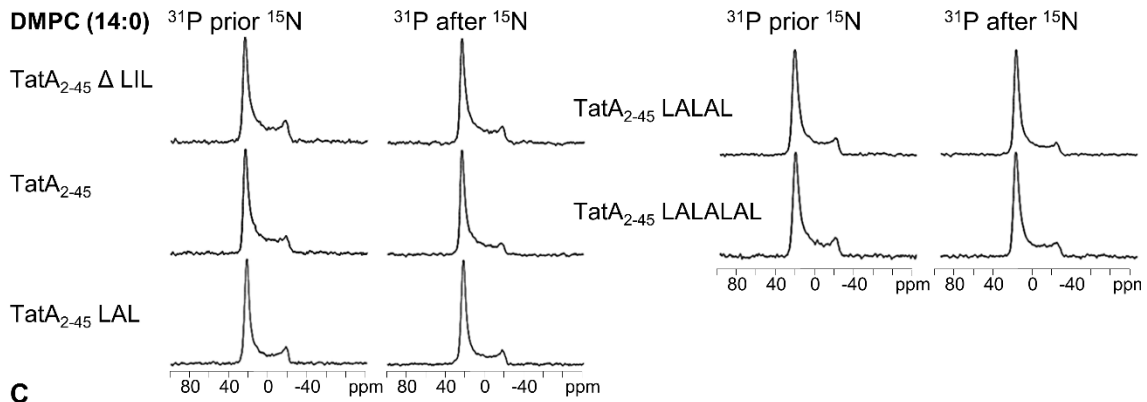**C**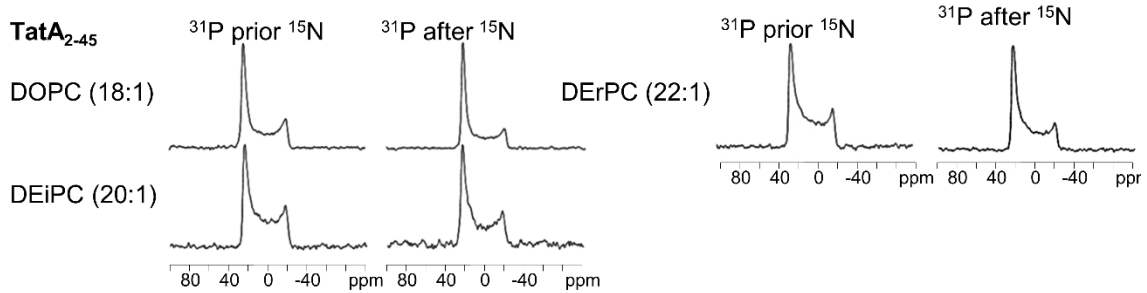

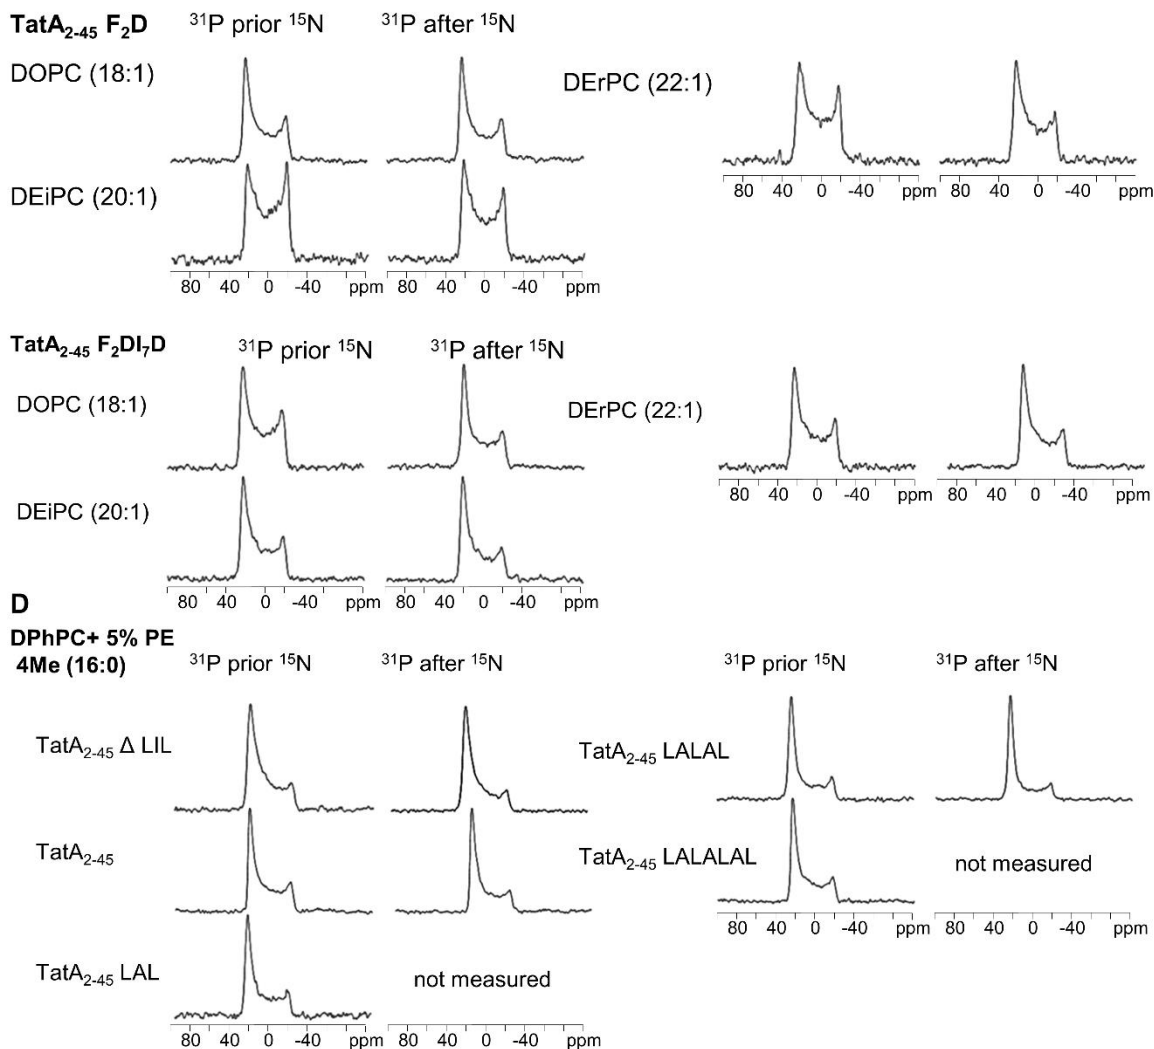

**Figure S2:**  $^{31}\text{P}$ -NMR spectra before and after the  $^{15}\text{N}$ -NMR measurements. One-dimensional solid-state  $^{31}\text{P}$ -NMR spectra were recorded to assess the quality of the lipid alignment and any potential sample degradation. NMR measurements were performed using the standard sample orientation in which the bilayer normal is aligned parallel to the static magnetic field. **(A)** The uniformly  $^{15}\text{N}$ -labelled  $\text{TatA}_{2-45}$  wild type was reconstituted in macroscopically aligned phosphatidylcholine bilayers with varying membrane thickness, composed of DOPC, DDPG, DLPC, DMPC, DOPC, DEiPC, DErPC, and DNPC (corresponding to Fig. 2). **(B)**  $\text{TatA}_{2-45}$  variants with an extended or shortened TMH were reconstituted in macroscopically aligned lipid bilayers composed of DMPC (corresponding to Fig. 3). **(C)**  $\text{TatA}_{2-45}$  variants with varying N-terminal charge density were reconstituted in macroscopically aligned lipid bilayers composed of DOPC, DEiPC and DErPC (corresponding to Fig. 4). **(D)**  $\text{TatA}_{2-45}$  variants with an extended or shortened TMH were reconstituted in branched phytanoyl lipids composed of a mixture of DPhPC/DPhPE (95/5 mol/mol) (corresponding to Fig. 5).

The spectral lineshape is composed of a superposition of the aligned lamellar phase (narrow signal at around 30 ppm, which arises due to the parallel alignment of the phospholipids to the magnetic field) and an upfield powder content, which is exceptionally pronounced only for the N-terminally charged variants. The  $^{31}\text{P}$ -NMR spectra show that the 14-22 hour  $^{15}\text{N}$ -NMR experiments had no perturbing effect on the orientation of the macroscopically aligned membranes in general.

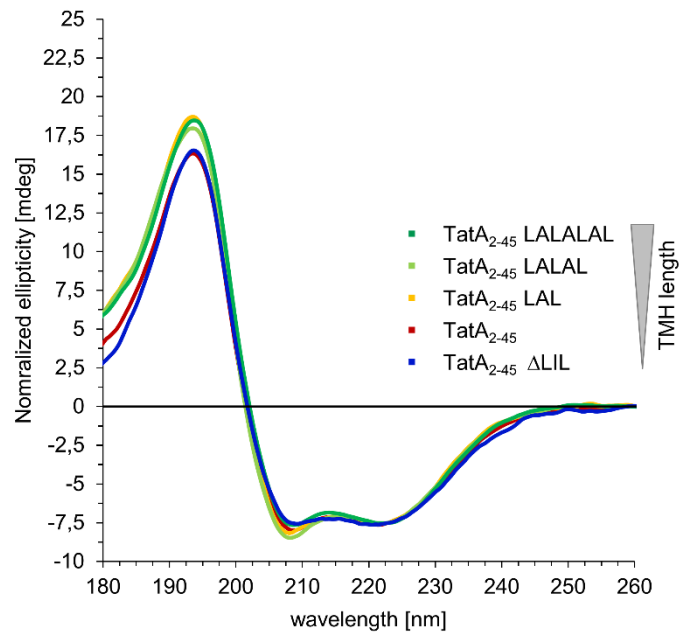

**Figure S3: SRCD spectra of TatA<sub>2-45</sub> and TatA<sub>2-45</sub> variants with an extended or shortened TMH reconstituted in DMPC vesicles.** All proteins were reconstituted in DMPC vesicles with a peptide to lipid ratio of 1:50. For direct comparison, the spectra were normalized at 223 nm. All spectra show a typical  $\alpha$ -helical line shape with characteristic bands at around 194 nm, 209 nm and 223 nm.

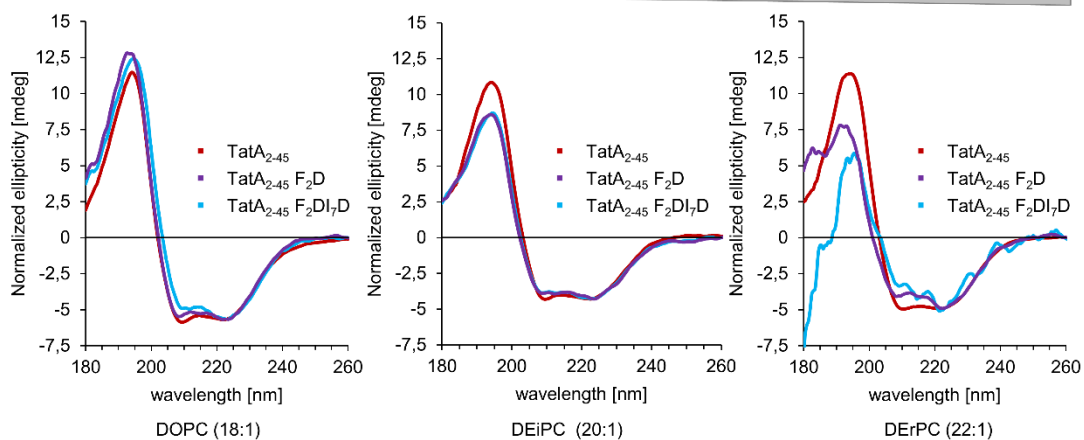

**Figure S4: SRCD spectra of TatA<sub>2-45</sub> and TatA<sub>2-45</sub> variants with an N-terminal charge reconstituted DOPC, DEiPC and DErPC vesicles.** All proteins were reconstituted with peptide to lipid ratio of 1:50. For direct comparison, the spectra were normalized at 223 nm. All spectra show a typical  $\alpha$ -helical line shape with characteristic bands at around 194 nm, 209 nm and 223 nm. In DEiPC TatA<sub>2-45</sub> F<sub>2</sub>D and TatA<sub>2-45</sub> F<sub>2</sub>DI<sub>7</sub>D start to show some amount of absorption flattening, which is in DErPC strongly pronounced. This behaviour is consistent with the observed protein aggregation in <sup>15</sup>N-NMR.



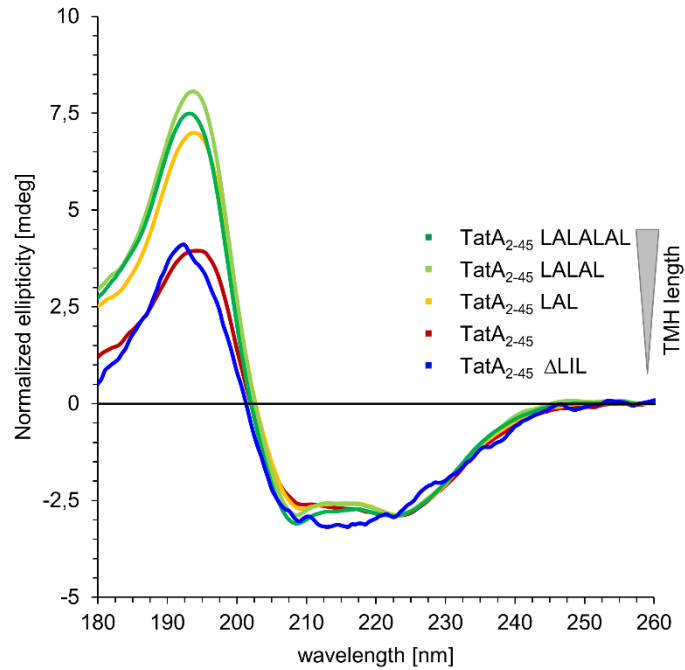

**Figure S5: SRCD spectra of TatA<sub>2-45</sub> and TatA<sub>2-45</sub> variants with an extended or shortened TMH reconstituted in DPhPC/DPhPE (95/5 mol/mol) vesicles.** All proteins were reconstituted in mixture of DPhPC/DPhPE (95/5 mol/mol) with a peptide to lipid ratio of 1:50. For direct comparison, the spectra were normalized at 223 nm. All spectra show a typical  $\alpha$ -helical line shape with characteristic bands at around 194 nm, 209 nm and 223 nm. The variants with extended TMHs possess a larger  $\alpha$ -helical content.

### Supplemental References

- [147] Larkin, M. A., Blackshields, G., Brown, N. P., Chenna, R., McGettigan, P. A., McWilliam, H., Valentin, F., Wallace, I. M., Wilm, A., Lopez, R., Thompson, J. D., Gibson, T. J. and Higgins, D. G. 2007. Clustal W and Clustal X version 2.0. *Bioinformatics* 23 (21): 2947-2948.
- [148] Waterhouse, A. M., Procter, J. B., Martin, D. M. A., Clamp, M. and Barton, G. J. 2009. Jalview Version 2--a multiple sequence alignment editor and analysis workbench. *Bioinformatics* 25 (9): 1189-1191.
